# Supplementary material for: Suppression of Hepcidin Expression and Iron Overload Mediate Salmonella Susceptibility in Ankyrin 1 ENU-Induced Mutant
Source: PLoS One. 2013 Feb 4;8(2):e55331. doi: 10.1371/journal.pone.0055331 (PMC3563626; doi:10.1371/journal.pone.0055331)
Supplement: Table S1 — Primer sequences used for quantitative PCR. Two housekeeping genes: Tbp (TATA box binding protein) and Hprt (hypoxanthine guanine phosphoribosyl transferase) were used. Hepcidin (Hamp), ferroportin (Slc40a1), interleukin 6 (Il6), inteleukin 1 (Il1), interferon gamma (Ifng), erythropoietin (Epo), heme oxygenase 1 (Hmox1) and growth differentiation factor 15 (Gdf15). (XLSX) [file pone.0055331.s004.xlsx]

## Sheet: Sheet1
Gene		Sequence
Tbp	F	CCCTTGTACCCTTCACCAAT
	R	TTACAGCCAAGATTCACGGT
Hprt	F	GTTGGATACAGGCCAGACTT
	F	GATTCAACTTGCGCTCATCT
Il1	F	GACATGAGCACCTTCTTTTC
	R	AGCCTGTAGTGCAGTTGTCT
Slc40a1	F	CATTGCTGCTAGAATCGGTC
	R	GCAATCGTGTCACCGTCAAA
Hamp	F	AAGCAGGGCAGACATTGCGAT
	R	CAGGATGTGGCTCTAGGCTATGT
Epo	F	CGTAGCCTCACTTCACTGCTT
	R	CGGAAGAGCTTGCAGAAAGTA
Il6	F	AGTTGCCTTCTTGGGACTGA
	R	CAGAATTGCCATTGCACAAC
Ifng	F	ACTGGCAAAAGGATGGTGAC
	R	ATCCTTTTTCGCCTTGCTGT
Gdf15	F	GCCCTGAGTCCCAACTCAAC
	R	CCAATCTCACCTCTGGACTGA
